# Supplementary material for: Star nanoparticles delivering HIV-1 peptide minimal immunogens elicit near-native envelope antibody responses in nonhuman primates
Source: PLoS Biol. 2019 Jun 17;17(6):e3000328. doi: 10.1371/journal.pbio.3000328 (PMC6597128; doi:10.1371/journal.pbio.3000328)
Supplement: S5 Table — Aglycone V3+ and Man9V3+ mAbs were isolated from animals from cohort 1; Man9V3+/SOSIP+ mAbs were isolated from an animal in cohort 2. Sort phenotype refers to the probe binding phenotype, as depicted in Fig 6a, 6c and 6e; mAb IDs also match with those listed in Fig 6. Multiple gene listings indicate the sequence could map to these genes with similar identity. mAb, monoclonal antibody; Man9V3, Env variable loop 3 oligomannose-9 glycopeptide; NHP, nonhuman primate; V3, Env variable loop 3. (XLSX) [file pbio.3000328.s005.xlsx]

## Sheet: Star Table 4
Sort Phenotype	mAb ID	VH gene	DH gene	JH gene	VH Divergence % (nt)	HCDR3 length (aa)
Aglycone V3+ / Man9V3+	1-03	IGHV3-ADF*01	not_found	JH-4*01	5.96	7
	1-05	IGHV4-AGP-U*01,IGHV4-ACQ-S*01,IGHV4-ABB-S*01	not_found	JH-4*01	7.43	10
	1-12	IGHV4-AGU*01	not_found	JH-4*01	6.35	13
	1-20	IGHV4-AGU*01	not_found	JH-4*01	6.95	12
	1-30	IGHV3-ADF*01	not_found	JH-4*01	6.29	9
	1-33	IGHV4-AGU*01	not_found	JH-4*01	4.35	12
	1-34	IGHV3-ADO*01	not_found	JH-6*01	4.97	7
Aglycone V3- / Man9V3+	2-04	IGHV5-AER*02	not_found	JH-2P*01	2.79	17
	2-06	IGHV3-AGZ-X*01	D4-37*01,D4-22*01	JH-6*01	7.77	14
	2-08	IGHV4-ADG-U*01	not_found	JH-4*01	6.02	13
	2-12	IGHV4-ADG-U*01	not_found	JH-6*01	6.02	12
	2-14	IGHV5-AER*02	not_found	JH-2P*01	3.04	17
	2-18	IGHV4-ADG-U*01	not_found	JH-5-1*01	7.69	9
	2-23	IGHV4-AGU*01	not_found	JH-4*01	2.34	13
	2-27	IGHV4-ADG-U*01	not_found	JH-6*01	5.69	12
	2-37	IGHV4-ADG-U*01	not_found	JH-4*01	6.02	13
Man9V3+ / SOSIP+	3-03	IGHV3-ADF*01	not_found	JH-4*01	4.97	9
	3-04	IGHV3-ADF*01	not_found	JH-4*01	4.3	9
	3-05	IGHV3-ADF*01	not_found	JH-4*01	3.64	9
	3-06	IGHV3-ADF*01	not_found	JH-4*01	4.3	9
	3-07	IGHV3-ADF*01	not_found	JH-4*01	6.29	9
	3-08	IGHV3-ADF*01	not_found	JH-4*01	3.97	9
	3-09	IGHV3-ADF*01	not_found	JH-4*01	3.97	9
	3-10	IGHV3-ADF*01	not_found	JH-4*01	5.63	9
	3-11	IGHV3-ADF*01	not_found	JH-4*01	4.97	9
	3-12	IGHV4-ACS-S*01,IGHV4-ABB-S*01	not_found	JH-3*01	6.99	6
	3-13	IGHV3-ADF*01	not_found	JH-4*01	3.31	9
	3-14	IGHV3-ADF*01	not_found	JH-4*01	4.3	9
	3-15	IGHV4-AEB*01	D3-14*01	JH-4*01	3.06	14
	3-16	IGHV3-ADF*01	not_found	JH-4*01	4.97	9
	3-17	IGHV3-ADF*01	not_found	JH-4*01	6.29	9
	3-18	IGHV4-AEB*01	D3-14*01	JH-4*01	3.06	14
	3-19	IGHV3-ADF*01	not_found	JH-4*01	5.3	9
	3-20	IGHV3-ADF*01	not_found	JH-4*01	6.29	9
	3-22	IGHV4-AEB*01	D3-14*01	JH-4*01	2.04	14
